# Supplementary material for: FUNGAL DYSBIOSIS CORRELATES WITH THE DEVELOPMENT OF TUMOUR-INDUCED CACHEXIA IN MICE
Source: bioRxiv or medRxiv preprint supplement (doi:10.1101/2020.06.29.171397), 2020-07-02
Supplement: Supplementary file [file media-1.pdf]

## 8.0 SUPPLEMENTARY MATERIALS

**Supplementary Table 1 - Number of *amplicons* obtained after sequencing and pre-processing the ITS1 region of SC and CC animals**

| <b>Animals</b> | <b>Total Number of Sequenced<br/><i>Amplicons</i></b> |
|----------------|-------------------------------------------------------|
| SC1            | 109,236                                               |
| SC2            | 66,436                                                |
| SC3            | 120,142                                               |
| SC4            | 135,404                                               |
| SC5            | 163,377                                               |
| SC6            | 144,145                                               |
| SC7            | 133,910                                               |
| SC8            | 153,817                                               |
| CC1            | 155,586                                               |
| CC2            | 141,331                                               |
| CC3            | 121,782                                               |
| CC4            | 124,370                                               |
| CC5            | 104,937                                               |
| CC6            | 137,693                                               |
| CC7            | 130,312                                               |
| CC8            | 120,530                                               |
| <b>Total</b>   | <b>1,036,541</b>                                      |
